# Supplementary material
Source: PubMed Central journal article supplement (PMC4432045)
Supplement: JCM.00227-15_zjm999094276so1.pdf [file JCM.00227-15_zjm999094276so1.pdf]

Table S1. Genetic characters of isolates obtained from fecal specimens of healthy Thai individuals.

| ID    | ST   | Phylogenetic group |
|-------|------|--------------------|
| KC55  | 10   | A                  |
| KC100 | 23   | A                  |
| KC137 | 46   | A                  |
| KC3   | 47   | A                  |
| KC007 | 48   | A                  |
| KC103 | 48   | A                  |
| KC118 | 52   | A                  |
| KC4   | 218  | A                  |
| KC94  | 218  | A                  |
| KC142 | 341  | A                  |
| KC74  | 394  | A                  |
| KC120 | 757  | A                  |
| KC64  | 772  | A                  |
| KC70  | 898  | A                  |
| KC155 | 952  | A                  |
| KC105 | 1112 | A                  |
| KC95  | 1114 | A                  |
| KC43  | 1397 | A                  |
| KC12  | 1721 | A                  |
| KC149 | 75   | B1                 |
| KC53  | 99   | B1                 |
| KC24  | 101  | B1                 |
| KC134 | 201  | B1                 |
| KC159 | 201  | B1                 |
| KC154 | 278  | B1                 |
| KC122 | 641  | B1                 |
| KC6   | 1081 | B1                 |
| KC26  | 1081 | B1                 |
| KC45  | 1081 | B1                 |
| KC113 | 131  | B2                 |
| KC109 | 595  | D                  |
| KC1   | 1629 | D                  |
